# Supplementary material
Source: PubMed Central journal article supplement (PMC6640278)
Supplement: MPP-12-731-s003.pdf [file MPP-12-731-s003.pdf]

**Supporting Table S1.** Mutant strains used in this study, with phenotypes noted.

| Strains/mutants                                  | Phenotype comments                                                                                                          |
|--------------------------------------------------|-----------------------------------------------------------------------------------------------------------------------------|
| B94                                              | Wild-type Xcc B94 strain                                                                                                    |
| B94 $\Delta$ <i>hrcC</i>                         | >10 fold reduction in <i>in-planta</i> population after vacuum infiltration                                                 |
| B186                                             | Wild-type Xcc B186; strain causes no obvious HR on Arabidopsis or <i>N. benthamiana</i> ; elicits substantial host defenses |
| B186-pDD62                                       | B186 with the pDD62 empty vector                                                                                            |
| B186-pDD62-AvrBsT                                | Triggers severe leaf collapse 24h after inoculation                                                                         |
| B186 $\Delta$ <i>hrcC</i>                        | 20-50 fold reduction in <i>in-planta</i> population after vacuum infiltration, elicits less host defense                    |
| B186 $\Delta$ <i>hrcC</i> -pDD62                 | B186 $\Delta$ <i>hrcC</i> with the pDD62 empty vector, causes no obvious HR on Arabidopsis Pi-0                             |
| B186 $\Delta$ <i>hrcC</i> -pDD62-AvrBsT          | Severe HR on Arabidopsis Pi-0 24h after inoculation                                                                         |
| B186 $\Delta$ <i>hrcC</i> (Kan <sup>R</sup> )    | B186 <i>hrcC</i> mutant with the pVSP61 empty vector                                                                        |
| B186 $\Delta$ <i>hrpE</i>                        | 20-50 fold reduction after vacuum infiltration                                                                              |
| B305                                             | Wild-type Xcc B305 strain; cause no obvious HR on Arabidopsis or <i>N. benthamiana</i>                                      |
| B305(Kan <sup>R</sup> )                          | Xcc B305 with the pVSP61 empty vector                                                                                       |
| B305-pDD62                                       | B305 with the pDD62 empty vector                                                                                            |
| B305-pDD62-AvrBsT                                | Causes obvious but moderate HR tissue collapse                                                                              |
| B305 $\Delta$ <i>hrcC</i>                        | Similar <i>in-planta</i> population size but less symptoms compared to wt; slightly less host defense elicitation           |
| B305 $\Delta$ <i>hrcC</i> -pDD62                 | B305 $\Delta$ <i>hrcC</i> with the pDD62 empty vector                                                                       |
| B305 $\Delta$ <i>hrcC</i> -pDD62-AvrBsT          | No obvious HR on Arabidopsis Pi-0                                                                                           |
| B305 $\Delta$ <i>hrcC</i> (Kan <sup>R</sup> )    | B305 $\Delta$ <i>hrcC</i> mutant with the pVSP61 empty vector                                                               |
| B305 $\Delta$ <i>hrcC</i> -comp                  | Carries wt <i>hrcC</i> on pVSP61; restored disease symptom elicitation as in wt Xcc B305                                    |
| B305 $\Delta$ <i>hrpE</i>                        | ~2 fold reduction in <i>in-planta</i> population size; but less symptoms                                                    |
| B305 $\Delta$ <i>flgB/C</i>                      | No altered <i>in-planta</i> population size                                                                                 |
| B305 $\Delta$ <i>hrcC/hrpE</i>                   | ~2 fold reduction of <i>in-planta</i> population size                                                                       |
| B305 $\Delta$ <i>hrcCAflgB/C</i>                 | No altered <i>in-planta</i> population size                                                                                 |
| B305 $\Delta$ <i>hrpEAflgB/C</i>                 | ~2 fold reduction of <i>in-planta</i> population size                                                                       |
| B305 $\Delta$ <i>flgB/C</i> $\Delta$ <i>tatC</i> | No altered <i>in-planta</i> population size                                                                                 |
| B305 $\Delta$ <i>hrcCAhrpEAflgB/C</i>            | ~2 fold reduction of <i>in-planta</i> population size                                                                       |
| B305 $\Delta$ <i>hrcCAhrpEA</i> <i>tatC</i>      | ~2 fold reduction of <i>in-planta</i> population size                                                                       |

**Supporting Table S2.** Primers for gene knockout, complementation and RT-PCR experiments<sup>a</sup>

| Gene               | Primer Name      | DNA sequence <sup>1</sup>                  |
|--------------------|------------------|--------------------------------------------|
| <i>hrcC</i>        | hrcC-F           | <u>AAGGATCC</u> GGAAGACGCGATCGAAGCCTTG     |
|                    | hrcC-del-R       | CGTGCAGCCCCGACGCGTTGCTGCGTTCCTCTGCGAGGAAGT |
|                    | hrcC-del-F       | ACTTCCTCGCAGAGGGAACGCAGCAACGCGTCGGGCTGCACG |
|                    | hrcC-R           | TTT <u>GAGCTC</u> GGCTGAAGCGCACAGCGTCG     |
|                    | hrcC-comp-F      | <u>AAGGATCC</u> GCTCATCGACGATGTGTCCG       |
|                    | hrcC-comp-R      | TTA <u>AAGCTT</u> CAACAGGACGGTGTGAGTCC     |
|                    | hrcC-probe-F     | GCGAACGAGACCAAGAATGC                       |
|                    | hrcC-probe-R     | GGCCTTGTTGGTCTGCTCGA                       |
| <i>hrpE</i>        | BamHI-hrpE-F     | <u>AAGGATCC</u> ATTGGCCGGACGATGTTGCG       |
|                    | hrpE-del-R       | CGTCATGTCAGGGCCTATTACTCCTTAGCTGAAGAGAAGT   |
|                    | hrpE-del-F       | ACTTCTCTTCAGCTAAGGAGTAATAGGCCCTGACATGACG   |
|                    | HindIII-hrpE-R   | TTA <u>AAGCTT</u> CTGTTGTGGTTGCCGCCATT     |
| <i>flgB/C</i>      | BamHI-flgB/C-F   | <u>AAGGATCC</u> AGCTGGTCACCTCCGACCGG       |
|                    | FlgB/C-del-R     | GAATGGTCCGTAAGGAAGGGCGGTGTTCTCCCGTGGAAGG   |
|                    | FlgB/C-del-F     | CCTTCCACGGGAGAACACCGCCCTTCTTACGGACCATTCC   |
|                    | HindIII-flgB/C-R | TTA <u>AAGCTT</u> CCACATTGCTGACGCGCACGC    |
| <b>For RT-PCR:</b> |                  |                                            |
| <i>ACT2</i>        | Actin-F          | AGGTTCTGTTCCAGCCATC                        |
|                    | Actin-R          | TTAGAAGCATTTCCTGTGAAC                      |
| <i>PR-1</i>        | PR1-F            | GTAGGTGCTCTTGTCTTCCC                       |
|                    | PR1-R            | CACATAATCCCACGAGGATC                       |
| <i>PR-5</i>        | PR5-F            | ACCTCTTGGTCTCTACTTTCATAT                   |
|                    | PR5-R            | TTCTCCTCGGTGACCACTTGATC                    |
| <i>WRKY29</i>      | WRKY29-F         | ATGGACGAAGGAGACCTAG                        |
|                    | WRKY29-R         | CTTTTCTTTGATTGGATTCTG                      |
| <i>TIR1</i>        | TIR1-F           | GCCTCTCTCTATCTGGCCTCTTGAC                  |
|                    | TIR1-R           | AGGGCAGCTCTCTGGTCTCGAGTCC                  |
| <i>FRK1</i>        | FRK1-F           | TACTATTCGACTCGCCAAATG                      |
|                    | FRK1-R           | CTACCTTGCTCGAGGAACC                        |

<sup>a</sup> Restriction enzyme recognition sites are underlined.
